# Supplementary material for: If you build it, they will come: rapid colonization by dragonflies in a new effluent-dependent river reach
Source: PeerJ journal article supplement (doi:10.7717/peerj.9856), 2020-09-16

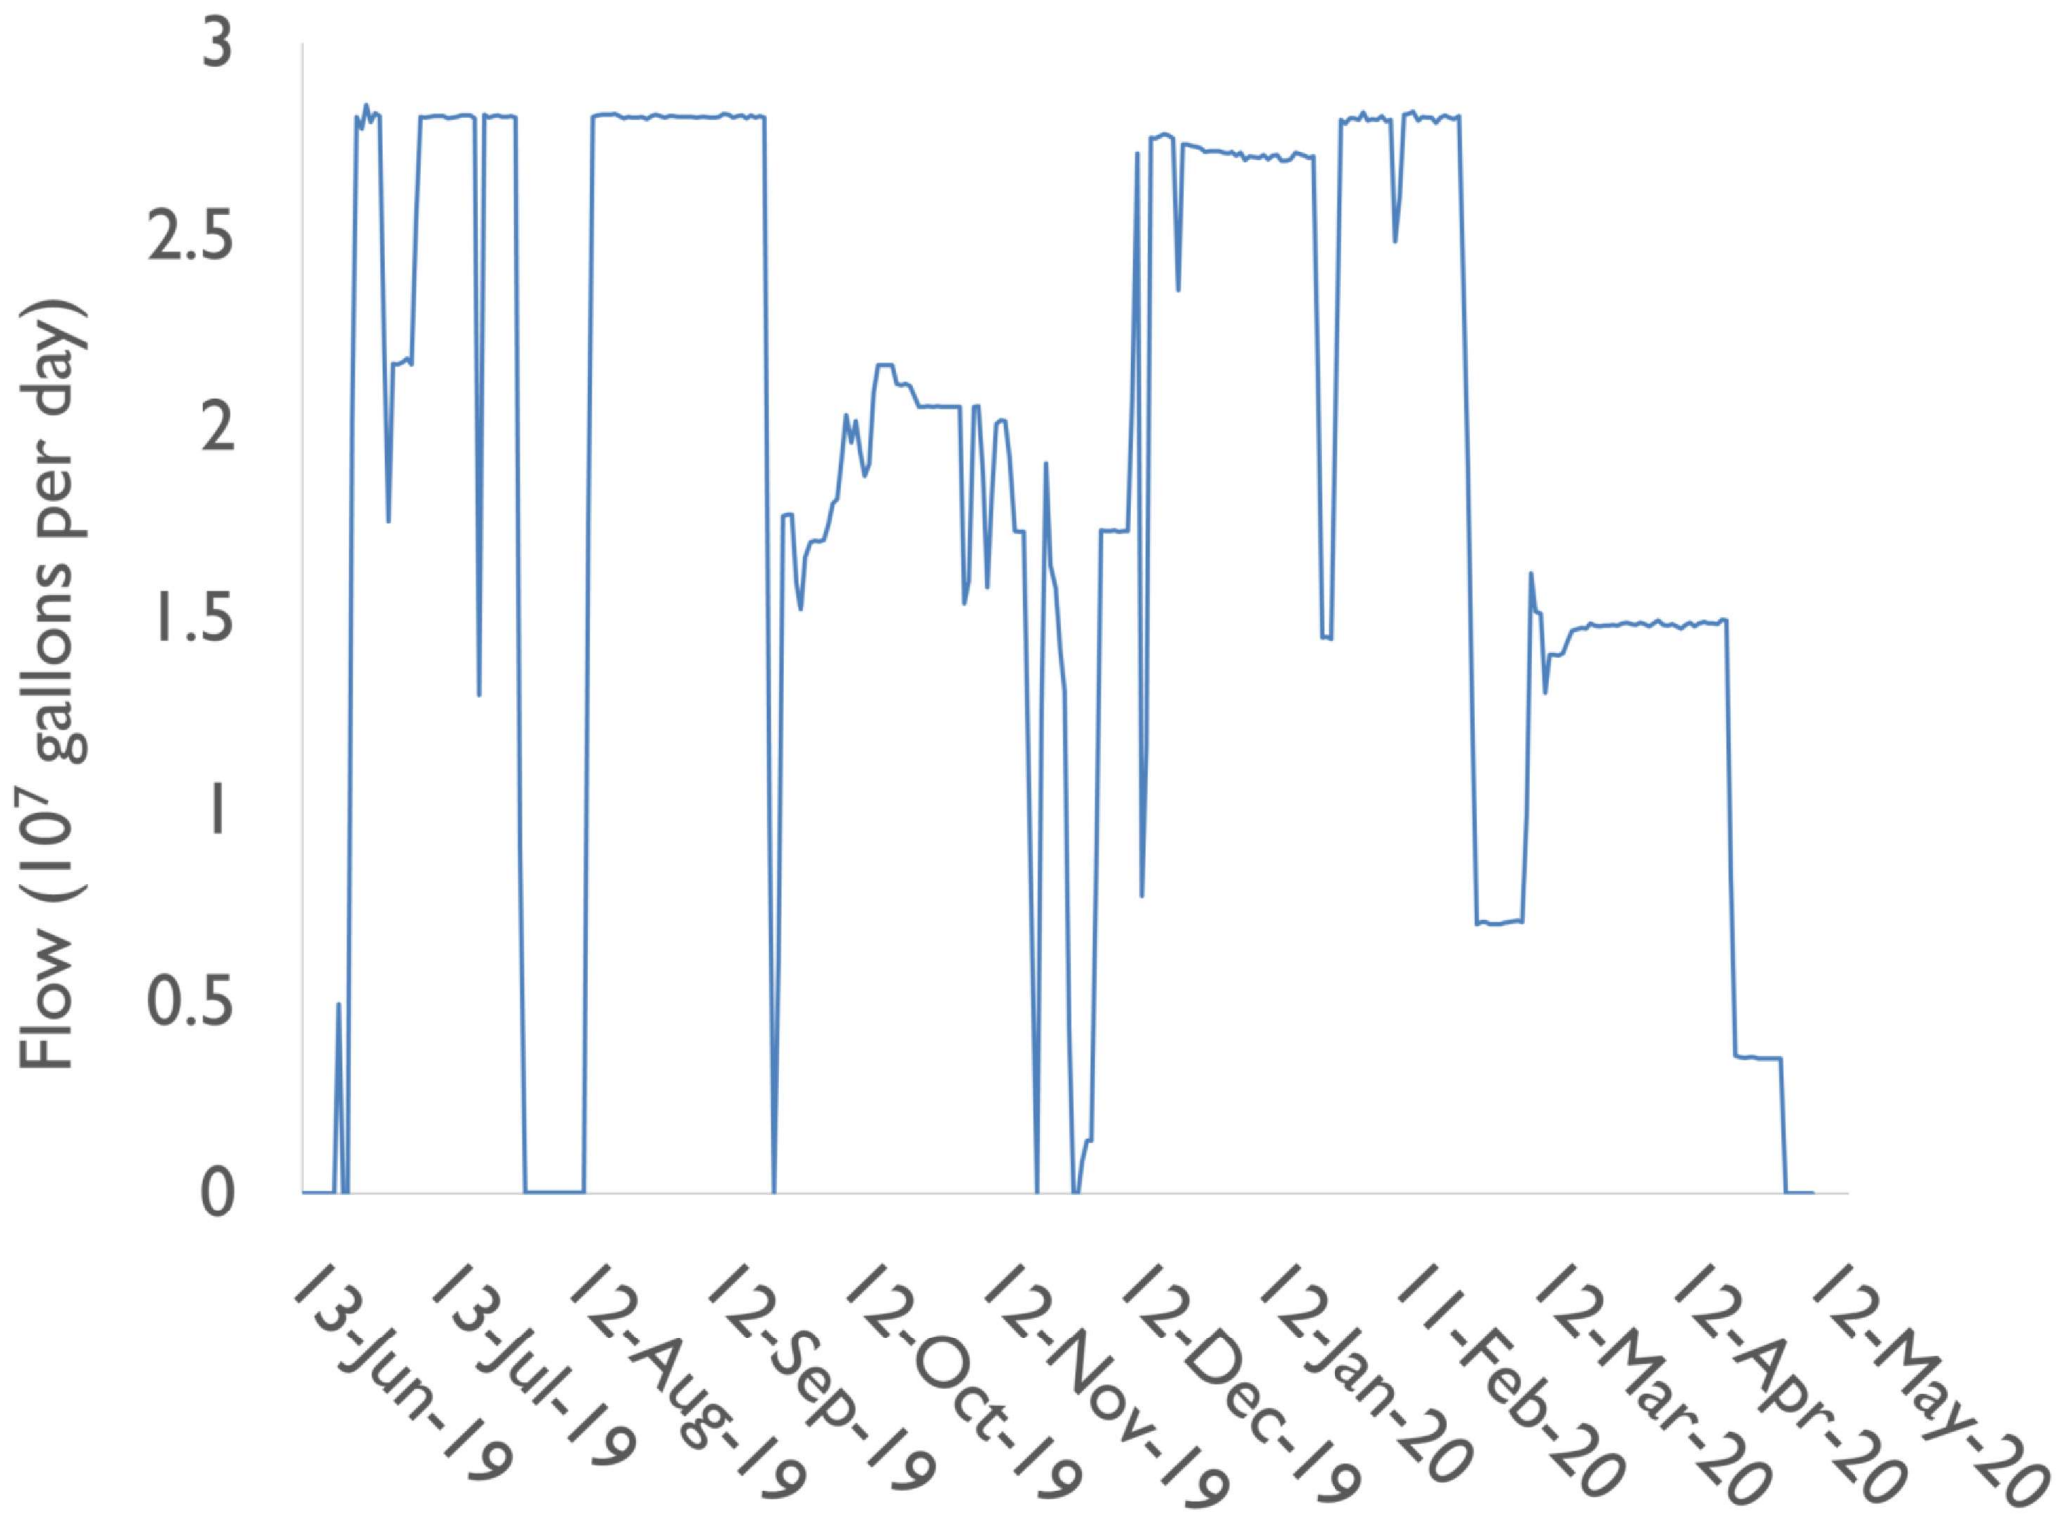

Supplement: SupplementalFigure1.pdf [file SupplementalFigure1.pdf]
